# Supplementary material for: Tailoring Nanoadsorbent Surfaces: Separation of Rare Earths and Late Transition Metals in Recycling of Magnet Materials
Source: MDPI journal article supplement (doi:10.3390/nano12060974), 2022-03-16
Supplement: s1 [file s1]

Supplementary Information

# Tailoring Nanoadsorbent Surfaces: Separation of Rare Earths and Late Transition Metals in Recycling of Magnet Materials

Ani Vardanyan <sup>1,\*</sup>, Anna Guillon <sup>1</sup>, Tetyana Budnyak <sup>2</sup> and Gulaim A. Seisenbaeva <sup>1,\*</sup>

<sup>1</sup> Department of Molecular Sciences, Swedish University of Agricultural Sciences, P.O. Box 7015, 75007 Uppsala, Sweden; anna.guillon@slu.se

<sup>2</sup> Department of Materials Science and Engineering, Division of Nanotechnology and Functional Materials, Uppsala University, P.O. Box 35, 75103 Uppsala, Sweden; tetyana.budnyak@angstrom.uu.se

\* Correspondence: ani.vardanyan@slu.se (A.V.); gulaim.seisenbaeva@slu.se (G.A.S.)

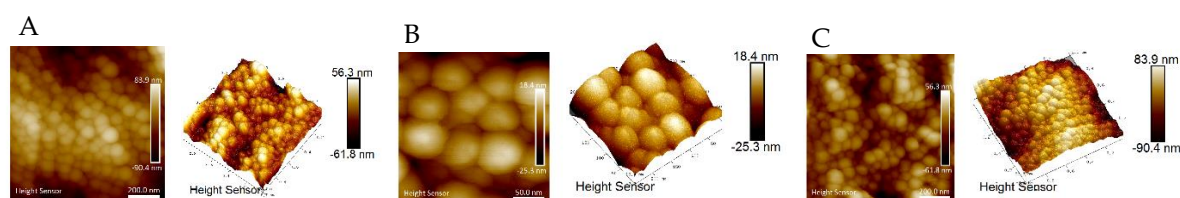

**Figure S1.** AFM images for acid treated SiO<sub>2</sub> NPs functionalized with L5 (A,B) and L3 ligands (C).

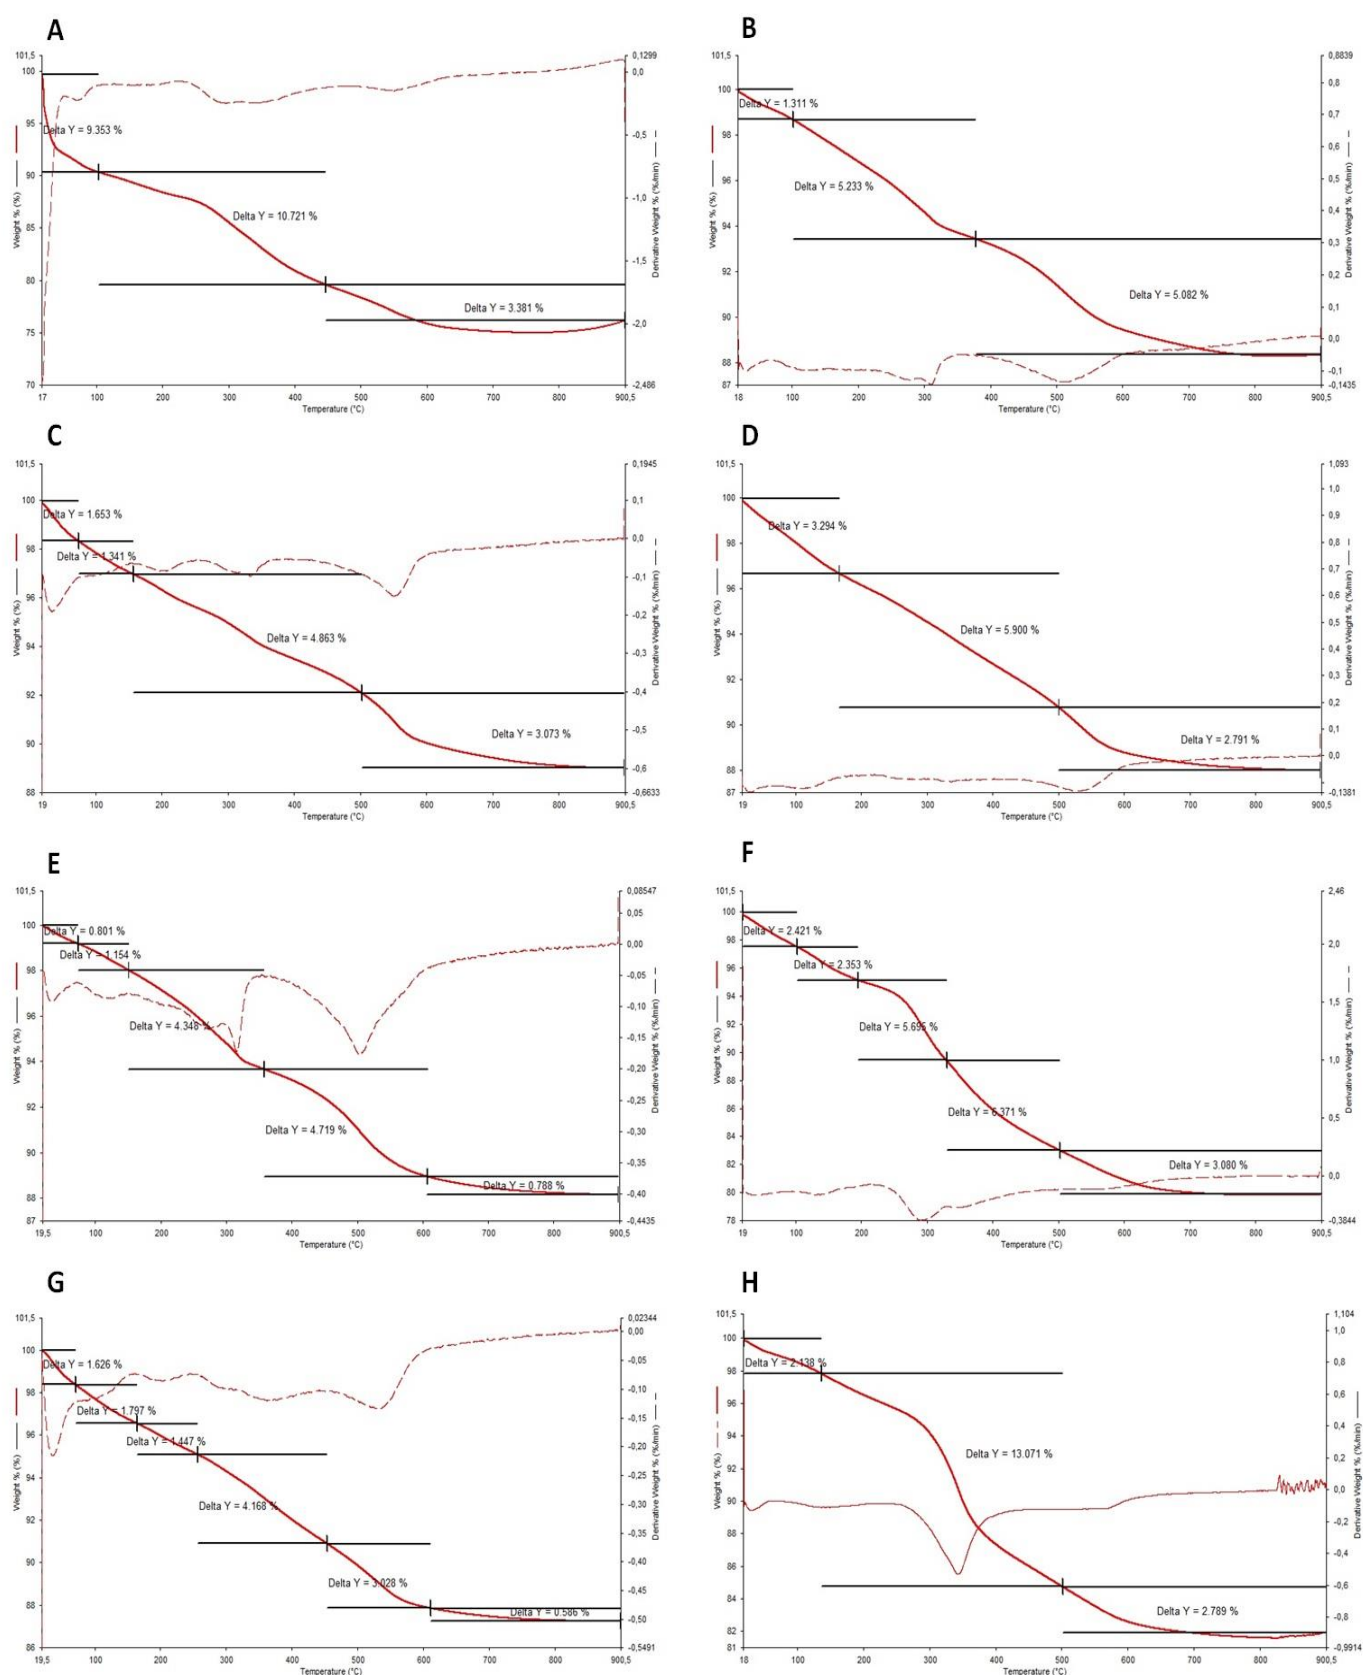

**Figure S2.** TGA analyses of grafted SiO<sub>2</sub> NPs: (A)-L1, (B)-L2, (C)-L3, (D)-L4, (E)-L5, (F)-L3\_acid, (G)-L4\_acid, (H)-L5\_acid.

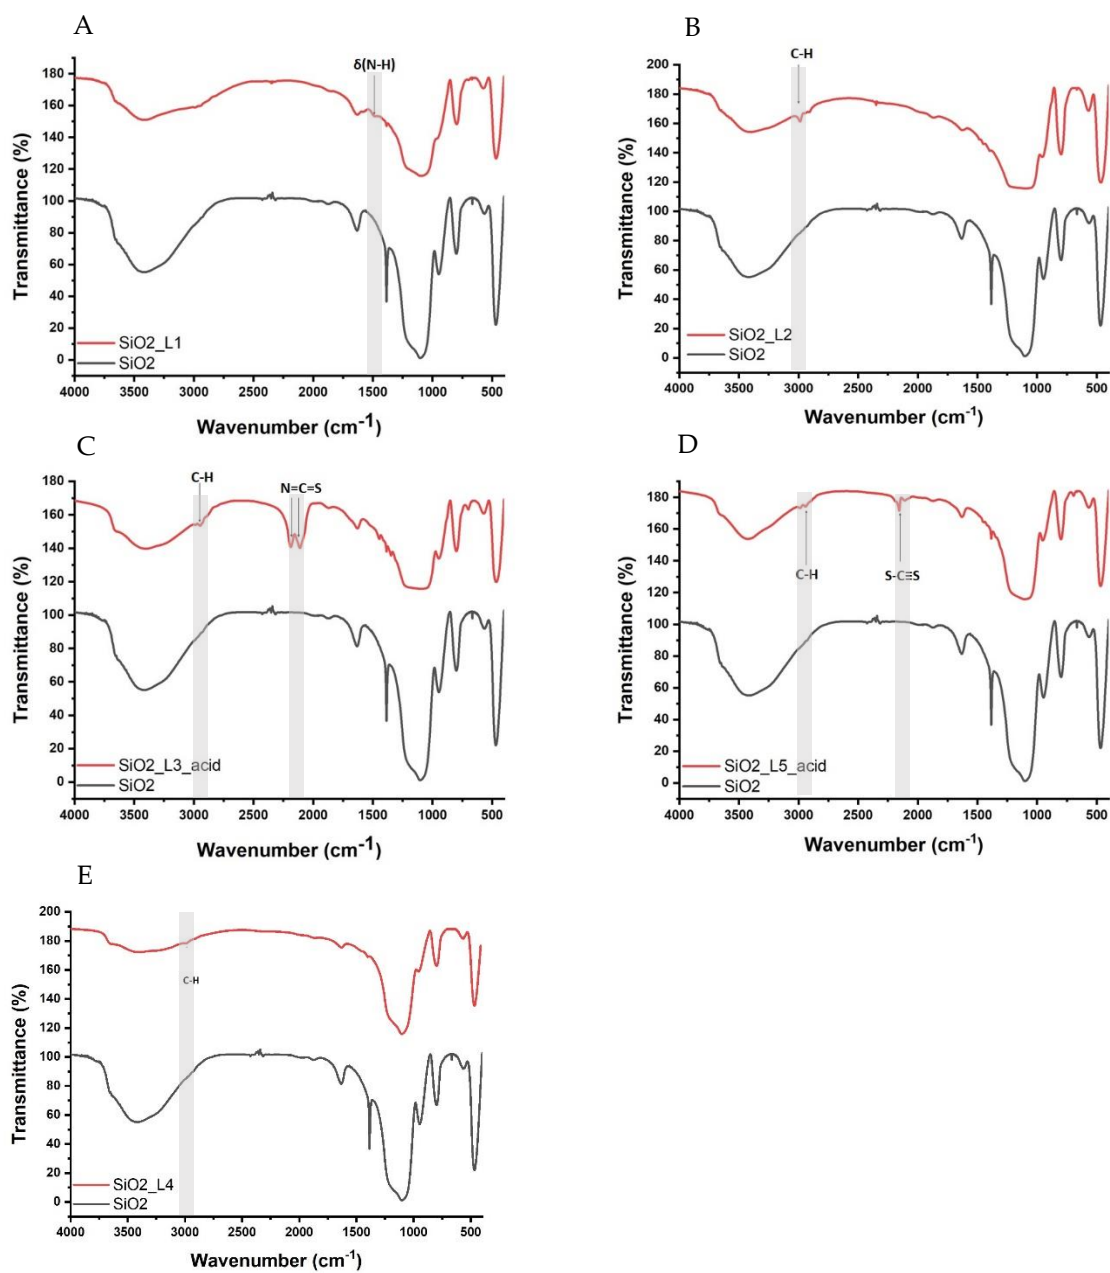

Figure S3. FTIR spectra of synthesized nanoparticles grafted with (A)-L1, (B)-L2, (C)-L3\_acid, (D)-L5\_acid, (E)-L4.

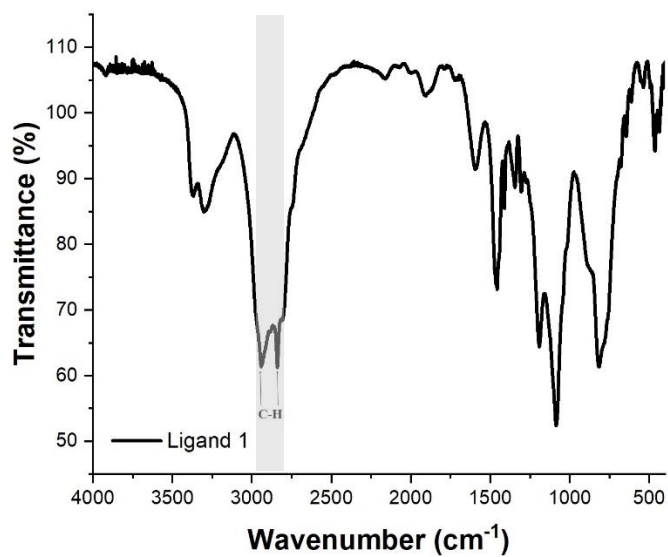

**Figure S4.** FTIR spectra of pure ligand (Ligand 1) before grafting.

**Table S1.** List of parameters obtained from Langmuir and Freundlich linear isotherm models.

| Model      |                      | L1               | L2   | L3   |
|------------|----------------------|------------------|------|------|------------------|------|------|------------------|------|------|------------------|------|------|
|            |                      | Co <sup>2+</sup> |      |      | Ni <sup>2+</sup> |      |      | Sm <sup>3+</sup> |      |      | Nd <sup>3+</sup> |      |      |
| Langmuir   | <b>q<sub>m</sub></b> | 1.90             | 0.86 | 0.83 | 1.82             | 0.62 | 0.60 | 1.31             | 0.64 | 0.78 | 1.12             | 0.6  | 0.86 |
|            | <b>K<sub>L</sub></b> | 0.35             | 0.14 | 0.38 | 0.48             | 0.37 | 0.88 | 0.27             | 0.36 | 0.27 | 0.16             | 0.26 | 0.16 |
|            | <b>R<sup>2</sup></b> | 0.99             | 0.98 | 0.99 | 0.98             | 0.99 | 0.99 | 0.99             | 0.99 | 0.99 | 0.99             | 0.99 | 0.99 |
| Freundlich | <b>K<sub>f</sub></b> | 0.43             | 0.09 | 0.19 | 0.47             | 0.13 | 0.25 | 0.23             | 0.16 | 0.17 | 0.14             | 0.12 | 0.11 |
|            | <b>n</b>             | 2.06             | 1.40 | 1.96 | 2.15             | 1.90 | 3.41 | 1.71             | 2.27 | 1.96 | 1.56             | 1.85 | 1.59 |
|            | <b>R<sup>2</sup></b> | 0.95             | 0.96 | 0.91 | 0.89             | 0.87 | 0.92 | 0.95             | 0.98 | 0.95 | 0.97             | 0.97 | 0.98 |

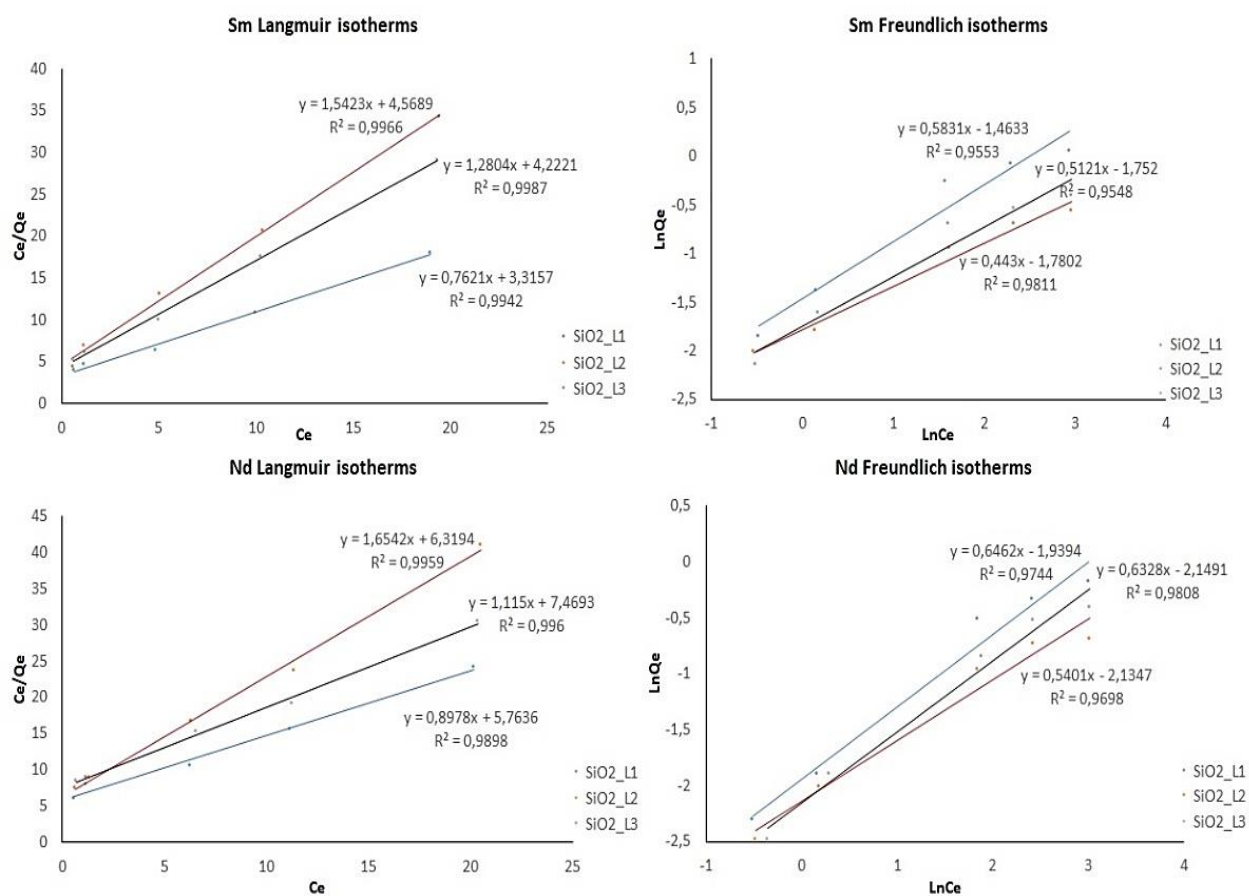

**Figure S5.** Linear plots of Langmuir and Freundlich isotherm models

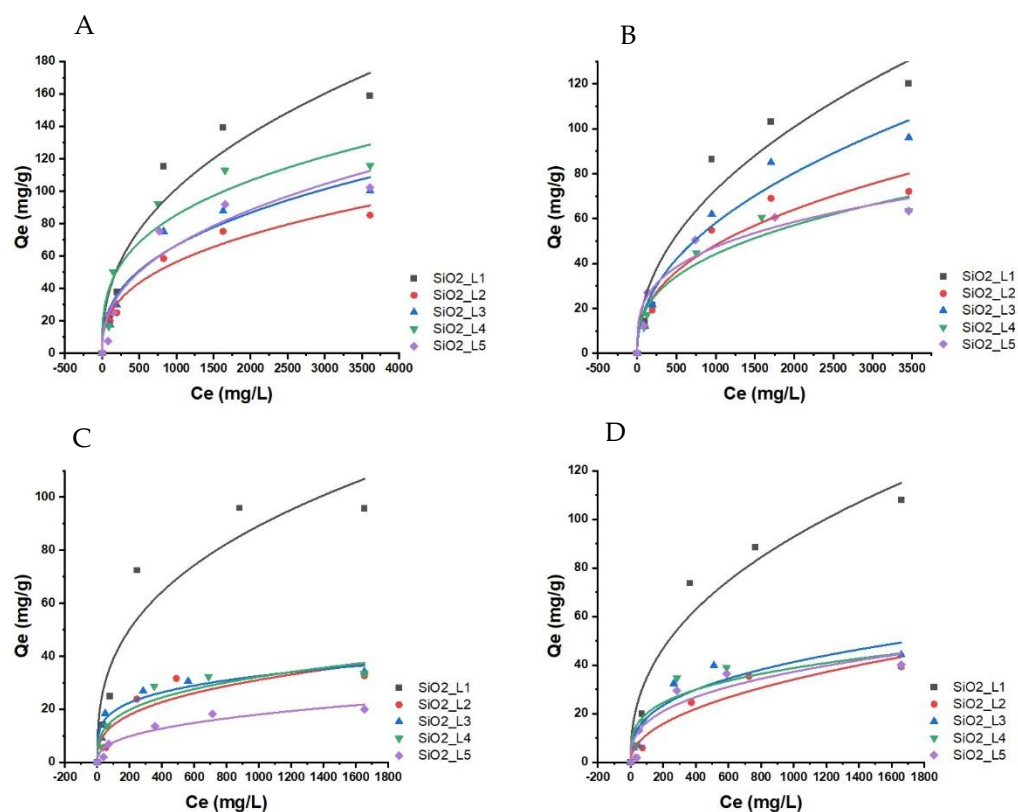

Figure S6. Freundlich adsorption isotherms of (A)-Sm, (B)-Nd, (C)-Ni and (D)-Co ions onto functionalized SiO<sub>2</sub> NPs

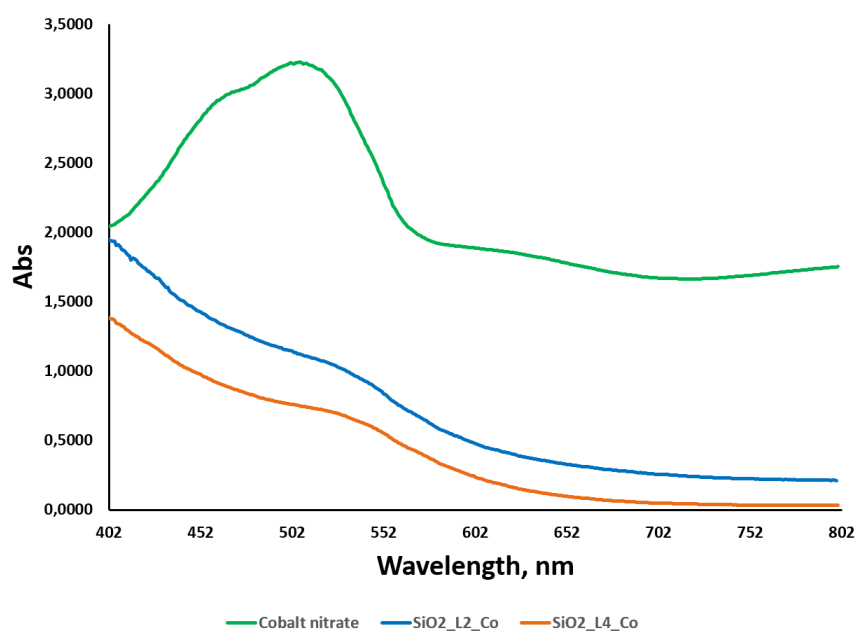

Figure S7. UV-Vis spectra of aqua complex of Co(II) and of adsorbents after uptake of cobalt(II) ions.

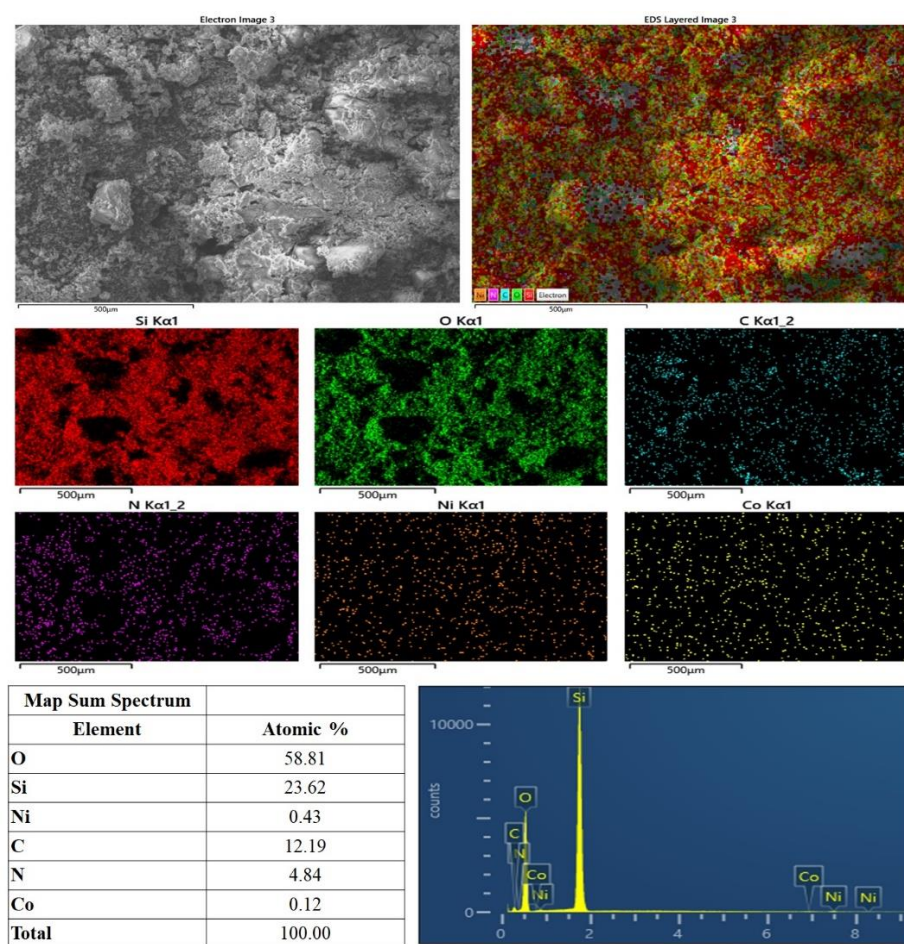

**Figure S8.** Example of EDS mapping of  $\text{SiO}_2\text{-L1}$  after adsorption of mixed Co + Sm metal ions. EDS analysis and mapping data for the rest of the samples is available upon request.
